# Supplementary material
Source: HighWire-hosted journal article supplement (https://bmjopen.bmj.com/content/8/6/e021890)
Supplement: inline-supplementary-material-4 [file inline-supplementary-material-4.pdf]

Dear XXXX

Thank you for choosing to take part in the TIME study.

We are interested in potential ways that taking your blood pressure medication at a certain time of day could affect your health and wellbeing.

One of the aspects that could be affected, positively or negatively, is sleep. We would like to invite you to take part in a questionnaire-based sub-study of TIME that will look at whether your sleep is affected by the time of dosage that you have been randomly allocated for the TIME study.

If you are interested in finding out more about this sleep quality sub-study, please click on the following link:

XXXXXXX

Your choice about whether to take part in this sub-study does not affect your participation in the main TIME study.

Thank you for your consideration,

The TIME study team
